# Supplementary material for: Chemical vapour deposition of titanium chalcogenides and pnictides and tungsten oxide thin films
Source: Royal Society of Chemistry journal article supplement (doi:10.1039/b513177d), 2006-01-01
Supplement: b513177d.pdf [file b513177d.pdf]

## **Chemical Vapour Deposition of Titanium Chalcogenides and Pnictides and Tungsten Oxide Thin Films**

Robert G. Palgrave and Ivan P. Parkin\*

\*Author to whom correspondence should be addressed

University College London, Department of Chemistry, 20 Gordon Street, London, UK  
WC1H 0AJ.

### **Electronic Supplementary Information**

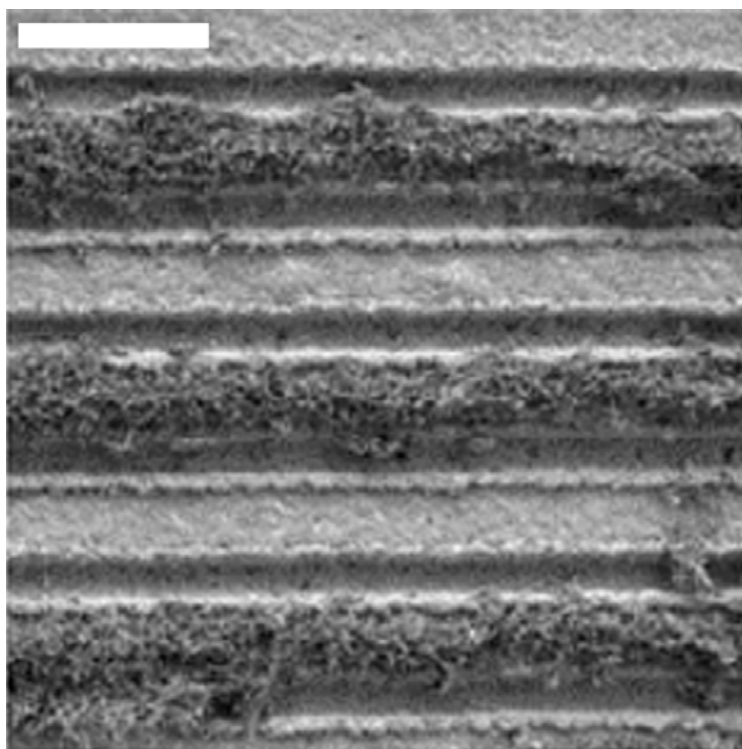

**Fig. S1:** SEM of a WO<sub>3</sub> film deposited by CVD onto an electrode array with an applied field of 10 V dc; scale bar: 2 microns
